# Supplementary material for: Identification and Validation of Inflammatory Response-Related Gene Signatures to Predict the Prognosis of Neuroblastoma
Source: Hindawi journal article supplement (doi:10.1155/2022/2417351), 2022-04-30
Supplement: f1 [file 2417351.f1.pdf]

| GeneSymbol | GeneDescription                                                           |
|------------|---------------------------------------------------------------------------|
| ABCA1      | ATP binding cassette subfamily A member 1                                 |
| ABI1       | abl interactor 1                                                          |
| ACVR1B     | activin A receptor type 1B                                                |
| ACVR2A     | activin A receptor type 2A                                                |
| ADM        | adrenomedullin                                                            |
| ADORA2B    | adenosine A2b receptor                                                    |
| ADRM1      | adhesion regulating molecule 1                                            |
| AHR        | aryl hydrocarbon receptor                                                 |
| APLNR      | apelin receptor                                                           |
| AQP9       | aquaporin 9                                                               |
| ATP2A2     | ATPase sarcoplasmic/endoplasmic reticulum Ca <sup>2+</sup> transporting 2 |
| ATP2B1     | ATPase plasma membrane Ca <sup>2+</sup> transporting 1                    |
| ATP2C1     | ATPase secretory pathway Ca <sup>2+</sup> transporting 1                  |
| AXL        | AXL receptor tyrosine kinase                                              |
| BDKRB1     | bradykinin receptor B1                                                    |
| BEST1      | bestrophin 1                                                              |
| BST2       | bone marrow stromal cell antigen 2                                        |
| BTG2       | BTG anti-proliferation factor 2                                           |
| C3AR1      | complement C3a receptor 1                                                 |
| C5AR1      | complement C5a receptor 1                                                 |
| CALCRL     | calcitonin receptor like receptor                                         |
| CCL17      | C-C motif chemokine ligand 17                                             |
| CCL2       | C-C motif chemokine ligand 2                                              |
| CCL20      | C-C motif chemokine ligand 20                                             |
| CCL22      | C-C motif chemokine ligand 22                                             |
| CCL24      | C-C motif chemokine ligand 24                                             |
| CCL5       | C-C motif chemokine ligand 5                                              |
| CCL7       | C-C motif chemokine ligand 7                                              |
| CCR7       | C-C motif chemokine receptor 7                                            |
| CCRL2      | C-C motif chemokine receptor like 2                                       |
| CD14       | CD14 molecule                                                             |
| CD40       | CD40 molecule                                                             |
| CD48       | CD48 molecule                                                             |
| CD55       | CD55 molecule (Cromer blood group)                                        |
| CD69       | CD69 molecule                                                             |
| CD70       | CD70 molecule                                                             |
| CD82       | CD82 molecule                                                             |
| CDKN1A     | cyclin dependent kinase inhibitor 1A                                      |
| CHST2      | carbohydrate sulfotransferase 2                                           |
| CLEC5A     | C-type lectin domain containing 5A                                        |
| CMKLR1     | chemerin chemokine-like receptor 1                                        |
| CSF1       | colony stimulating factor 1                                               |
| CSF3       | colony stimulating factor 3                                               |
| CSF3R      | colony stimulating factor 3 receptor                                      |
| CX3CL1     | C-X3-C motif chemokine ligand 1                                           |
| CXCL10     | C-X-C motif chemokine ligand 10                                           |
| CXCL11     | C-X-C motif chemokine ligand 11                                           |
| CXCL6      | C-X-C motif chemokine ligand 6                                            |
| CXCL9      | C-X-C motif chemokine ligand 9                                            |
| CXCR6      | C-X-C motif chemokine receptor 6                                          |
| CYBB       | cytochrome b-245 beta chain                                               |
| DCBLD2     | discoidin, CUB and LCCL domain containing 2                               |
| EBI3       | Epstein-Barr virus induced 3                                              |

|         |                                                                           |
|---------|---------------------------------------------------------------------------|
| EDN1    | endothelin 1                                                              |
| EIF2AK2 | eukaryotic translation initiation factor 2 alpha kinase 2                 |
| EMP3    | epithelial membrane protein 3                                             |
| ADGRE1  | adhesion G protein-coupled receptor E1                                    |
| EREG    | epiregulin                                                                |
| F3      | coagulation factor III, tissue factor                                     |
| FFAR2   | free fatty acid receptor 2                                                |
| FPR1    | formyl peptide receptor 1                                                 |
| FZD5    | frizzled class receptor 5                                                 |
| GABBR1  | gamma-aminobutyric acid type B receptor subunit 1                         |
| GCH1    | GTP cyclohydrolase 1                                                      |
| GNA15   | G protein subunit alpha 15                                                |
| GNAI3   | G protein subunit alpha i3                                                |
| GP1BA   | glycoprotein Ib platelet subunit alpha                                    |
| GPC3    | glypican 3                                                                |
| GPR132  | G protein-coupled receptor 132                                            |
| GPR183  | G protein-coupled receptor 183                                            |
| HAS2    | hyaluronan synthase 2                                                     |
| HBEGF   | heparin binding EGF like growth factor                                    |
| HIF1A   | hypoxia inducible factor 1 subunit alpha                                  |
| HPN     | hepsin                                                                    |
| HRH1    | histamine receptor H1                                                     |
| ICAM1   | intercellular adhesion molecule 1                                         |
| ICAM4   | intercellular adhesion molecule 4                                         |
| ICOSLG  | inducible T cell costimulator ligand                                      |
| IFITM1  | interferon induced transmembrane protein...                               |
| IFNAR1  | interferon alpha and beta receptor subun...                               |
| IFNGR2  | interferon gamma receptor 2                                               |
| IL10    | interleukin 10                                                            |
| IL10RA  | interleukin 10 receptor subunit alpha                                     |
| IL12B   | interleukin 12B                                                           |
| IL15    | interleukin 15                                                            |
| IL15RA  | interleukin 15 receptor subunit alpha                                     |
| IL18    | interleukin 18                                                            |
| IL18R1  | interleukin 18 receptor 1                                                 |
| IL18RAP | interleukin 18 receptor accessory protein                                 |
| IL1A    | interleukin 1 alpha                                                       |
| IL1B    | interleukin 1 beta                                                        |
| IL1R1   | interleukin 1 receptor type 1                                             |
| IL2RB   | interleukin 2 receptor subunit beta                                       |
| IL4R    | interleukin 4 receptor                                                    |
| IL6     | interleukin 6                                                             |
| IL7R    | interleukin 7 receptor                                                    |
| CXCL8   | C-X-C motif chemokine ligand 8                                            |
| INHBA   | inhibin subunit beta A                                                    |
| IRAK2   | interleukin 1 receptor associated kinase 2                                |
| IRF1    | interferon regulatory factor 1                                            |
| IRF7    | interferon regulatory factor 7                                            |
| ITGA5   | integrin subunit alpha 5                                                  |
| ITGB3   | integrin subunit beta 3                                                   |
| ITGB8   | integrin subunit beta 8                                                   |
| KCNA3   | potassium voltage-gated channel subfamily A member 3                      |
| KCNJ2   | potassium inwardly rectifying channel subfamily J member 2                |
| KCNMB2  | potassium calcium-activated channel subfamily M regulatory beta subunit 2 |

|         |                                                        |
|---------|--------------------------------------------------------|
| KIF1B   | kinesin family member 1B                               |
| KLF6    | Kruppel like factor 6                                  |
| LAMP3   | lysosomal associated membrane protein 3                |
| LCK     | LCK proto-oncogene, Src family tyrosine kinase         |
| LCP2    | lymphocyte cytosolic protein 2                         |
| LDLR    | low density lipoprotein receptor                       |
| LIF     | LIF interleukin 6 family cytokine                      |
| LPAR1   | lysophosphatidic acid receptor 1                       |
| LTA     | lymphotoxin alpha                                      |
| LY6E    | lymphocyte antigen 6 family member E                   |
| LYN     | LYN proto-oncogene, Src family tyrosine kinase         |
| MARCO   | macrophage receptor with collagenous structure         |
| MEFV    | MEFV innate immunity regulator, pyrin                  |
| MEP1A   | mepripin A subunit alpha                               |
| MET     | MET proto-oncogene, receptor tyrosine kinase           |
| MMP14   | matrix metalloproteinase 14                            |
| MSR1    | macrophage scavenger receptor 1                        |
| MXD1    | MAX dimerization protein 1                             |
| MYC     | MYC proto-oncogene, bHLH transcription factor          |
| NAMPT   | nicotinamide phosphoribosyltransferase                 |
| NDP     | norrin cystine knot growth factor NDP                  |
| NFKB1   | nuclear factor kappa B subunit 1                       |
| NFKBIA  | NFKB inhibitor alpha                                   |
| NLRP3   | NLR family pyrin domain containing 3                   |
| NMI     | N-myc and STAT interactor                              |
| NMUR1   | neuromedin U receptor 1                                |
| NOD2    | nucleotide binding oligomerization domain containing 2 |
| NPFFR2  | neuropeptide FF receptor 2                             |
| OLR1    | oxidized low density lipoprotein receptor 1            |
| OPRK1   | opioid receptor kappa 1                                |
| OSM     | oncostatin M                                           |
| OSMR    | oncostatin M receptor                                  |
| P2RX4   | purinergic receptor P2X 4                              |
| P2RX7   | purinergic receptor P2X 7                              |
| P2RY2   | purinergic receptor P2Y2                               |
| PCDH7   | protocadherin 7                                        |
| PDE4B   | phosphodiesterase 4B                                   |
| PDPN    | podoplanin                                             |
| PIK3R5  | phosphoinositide-3-kinase regulatory subunit 5         |
| PLAUR   | plasminogen activator, urokinase receptor              |
| PROK2   | prokineticin 2                                         |
| PSEN1   | presenilin 1                                           |
| PTAFR   | platelet activating factor receptor                    |
| PTGER2  | prostaglandin E receptor 2                             |
| PTGER4  | prostaglandin E receptor 4                             |
| PTGIR   | prostaglandin I2 receptor                              |
| PTPRE   | protein tyrosine phosphatase receptor type E           |
| PVR     | PVR cell adhesion molecule                             |
| RAF1    | Raf-1 proto-oncogene, serine/threonine kinase          |
| RASGRP1 | RAS guanyl releasing protein 1                         |
| RELA    | RELA proto-oncogene, NF-kB subunit                     |
| RGS1    | regulator of G protein signaling 1                     |
| RGS16   | regulator of G protein signaling 16                    |
| RHOG    | ras homolog family member G                            |

|          |                                                           |
|----------|-----------------------------------------------------------|
| RIPK2    | receptor interacting serine/threonine kinase 2            |
| RNF144B  | ring finger protein 144B                                  |
| ROS1     | ROS proto-oncogene 1, receptor tyrosine kinase            |
| RTP4     | receptor transporter protein 4                            |
| SCARF1   | scavenger receptor class F member 1                       |
| SCN1B    | sodium voltage-gated channel beta subunit 1               |
| SELE     | selectin E                                                |
| SELL     | selectin L                                                |
| SELENOS  | selenoprotein S                                           |
| SEMA4D   | semaphorin 4D                                             |
| SERPINE1 | serpin family E member 1                                  |
| SGMS2    | sphingomyelin synthase 2                                  |
| SLAMF1   | signaling lymphocytic activation molecule family member 1 |
| SLC11A2  | solute carrier family 11 member 2                         |
| SLC1A2   | solute carrier family 1 member 2                          |
| SLC28A2  | solute carrier family 28 member 2                         |
| SLC31A1  | solute carrier family 31 member 1                         |
| SLC31A2  | solute carrier family 31 member 2                         |
| SLC4A4   | solute carrier family 4 member 4                          |
| SLC7A1   | solute carrier family 7 member 1                          |
| SLC7A2   | solute carrier family 7 member 2                          |
| SPHK1    | sphingosine kinase 1                                      |
| SRI      | sorcin                                                    |
| STAB1    | stabilin 1                                                |
| TACR1    | tachykinin receptor 1                                     |
| TACR3    | tachykinin receptor 3                                     |
| TAPBP    | TAP binding protein                                       |
| TIMP1    | TIMP metalloproteinase inhibitor 1                        |
| TLR1     | toll like receptor 1                                      |
| TLR2     | toll like receptor 2                                      |
| TLR3     | toll like receptor 3                                      |
| TNFAIP6  | TNF alpha induced protein 6                               |
| TNFRSF1B | TNF receptor superfamily member 1B                        |
| TNFRSF9  | TNF receptor superfamily member 9                         |
| TNFSF10  | TNF superfamily member 10                                 |
| TNFSF15  | TNF superfamily member 15                                 |
| TNFSF9   | TNF superfamily member 9                                  |
| TPBG     | trophoblast glycoprotein                                  |
| VIP      | vasoactive intestinal peptide                             |
